# Supplementary material for: A facile one-pot synthesis of tetrahydrobenzo[b]pyrans and 2-amino-4H-chromenes under green conditions
Source: Royal Society of Chemistry journal article supplement (doi:10.1039/d4ra04239e), 2024-01-01
Supplement: d4ra04239e1.pdf [file d4ra04239e1.pdf]

*Electronic Supplementary Information (ESI)*

**A facile one-pot synthesis of tetrahydrobenzo[*b*]pyrans and 2-amino-4*H*-chromenes under green conditions**

Sarieh Momeni, Ramin Ghorbani-Vaghei\*

Department of Organic Chemistry, Faculty of Chemistry and Petroleum Sciences, Bu-Ali

Sina University, 6517838683, Hamadan, *Iran*

\*Corresponding author; E-mail: [rgvaghei@yahoo.com](mailto:rgvaghei@yahoo.com) & [ghorbani@basu.ac.ir](mailto:ghorbani@basu.ac.ir)

## Spectral Data:

### S1. 2-amino-4-(4-chlorophenyl)-7,7-dimethyl-5-oxo-5,6,7,8-tetrahydro-4H-chromene-3-carbonitrile

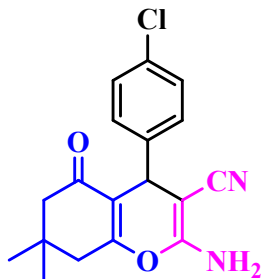

Melting point=190-192 °C,

FT-IR (KBr,  $\nu$   $\text{cm}^{-1}$ ): 3460, 3381, 3325, 3185, 2959, 2189, 1675, 1655, 1636, 1491, 1366, 1215, 1033, 855, 771, 563;  $^1\text{H}$  NMR (250 MHz,  $\text{DMSO-}d_6$ )  $\delta$  7.32 (d,  $J = 7.9$  Hz, 2H), 7.15 (d,  $J = 7.6$  Hz, 2H), 7.01 (d,  $J = 4.3$  Hz, 2H), 4.17 (s, 1H), 2.49 (s, 2H), 2.38 – 1.94 (m, 2H), 1.00 (d,  $J = 4.2$  Hz, 3H), 0.92 (d,  $J = 4.0$  Hz, 3H);  $^{13}\text{C}$  NMR (63 MHz,  $\text{DMSO-}d_6$ )  $\delta$  196.10, 163.05, 158.96, 144.17, 131.55, 129.55, 128.72, 119.96, 112.79, 58.26, 50.40, 35.56, 32.22, 28.73, 27.31.

### 2-amino-7,7-dimethyl-4-(4-nitrophenyl)-5-oxo-5,6,7,8-tetrahydro-4H-chromene-3-carbonitrile

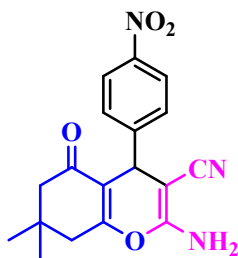

FT-IR (KBr,  $\nu$   $\text{cm}^{-1}$ ): 3411, 3330, 3256, 3213, 2959, 2192, 1682, 1659, 1594, 1518, 1366, 1346, 1253, 1214, 1039, 829, 700, 562;  $^1\text{H}$  NMR (250 MHz,  $\text{DMSO-}d_6$ )  $\delta$  8.15 (d,  $J = 8.2$  Hz, 2H), 7.42 (d,  $J = 8.2$  Hz, 2H), 7.16 (s, 2H), 4.34 (s, 1H), 2.51 (s, 2H), 2.33 – 2.01 (m, 2H), 1.02 (s, 3H), 0.93 (s, 3H).  $^{13}\text{C}$  NMR (63 MHz,  $\text{DMSO-}d_6$ )  $\delta$  196.16, 163.57, 159.06, 152.74, 146.73, 129.07, 124.12, 119.77, 112.18, 57.43, 50.31, 36.09, 32.27, 28.70, 27.38.

**2-amino-4-(4-chloro-3-nitrophenyl)-7,7-dimethyl-5-oxo-5,6,7,8-tetrahydro-4H-chromene-3-carbonitrile**

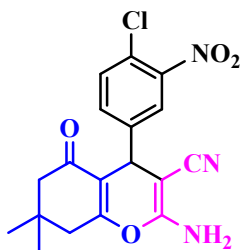

$^1\text{H}$  NMR (250 MHz,  $\text{DMSO-}d_6$ )  $\delta$  7.83 (s, 1H), 7.67 (s, 1H), 7.50 (s, 1H), 7.17 (s, 2H), 4.34 (s, 1H), 2.53 (s, 2H), 2.15 (q,  $J = 17.5, 16.0$  Hz, 2H), 0.99 (s, 3H), 0.93 (s, 3H).  $^{13}\text{C}$  NMR (63 MHz,  $\text{DMSO-}d_6$ )  $\delta$  196.29, 163.75, 159.04, 148.00, 146.43, 133.24, 131.98, 124.53, 123.36, 119.73, 111.76, 57.23, 50.32, 35.45, 32.25, 28.57, 27.49.

**2-amino-4-(2,4-dichlorophenyl)-7,7-dimethyl-5-oxo-5,6,7,8-tetrahydro-4H-chromene-3-carbonitrile**

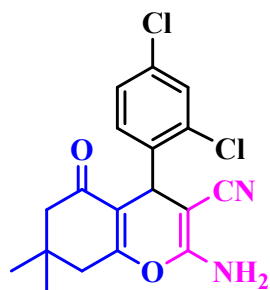

FT-IR (KBr,  $\nu$   $\text{cm}^{-1}$ ): 3460, 3356, 3334, 3163, 2961, 2193, 1665, 1660, 1650, 1474, 1366, 1216, 1044, 855, 560;  $^1\text{H}$  NMR (250 MHz,  $\text{DMSO-}d_6$ )  $\delta$  7.48 (s, 1H), 7.31 (s, 1H), 7.18 (s, 1H), 7.05 (s, 2H), 4.64 (s, 1H), 2.52 (s, 1H), 2.13 (q,  $J = 16.4, 15.4$  Hz, 2H), 1.00 (s, 3H), 0.94 (s, 3H).  $^{13}\text{C}$  NMR (63 MHz,  $\text{DMSO-}d_6$ )  $\delta$  196.04, 163.75, 159.15, 141.15, 133.46, 132.21, 131.86, 129.18, 128.07, 119.53, 111.81, 56.72, 50.34, 32.18, 28.74, 27.37.

**2-amino-4-(4-methoxyphenyl)-7,7-dimethyl-5-oxo-5,6,7,8-tetrahydro-4H-chromene-3-**

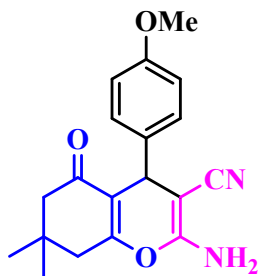

**carbonitrile**

$^1\text{H}$  NMR (250 MHz,  $\text{DMSO-}d_6$ )  $\delta$  7.02 (d,  $J = 8.1$  Hz, 2H), 6.93 (s, 2H), 6.81 (d,  $J = 8.2$  Hz, 2H), 4.09 (s, 1H), 3.68 (s, 3H), 2.52 (s, 2H), 2.39 – 1.84 (m, 2H), 1.00 (s, 3H), 0.92 (s, 3H).  $^{13}\text{C}$  NMR (63 MHz,  $\text{DMSO-}d_6$ )  $\delta$  196.10, 162.57, 158.89, 158.36, 137.28, 128.65, 120.25, 114.12, 113.43, 58.98, 55.42, 50.45, 35.17, 32.21, 28.83, 27.21.

**4,4'-(1,4-phenylene)bis(2-amino-7,7-dimethyl-5-oxo-5,6,7,8-tetrahydro-4H-chromene-3-**  
**carbonitrile)**

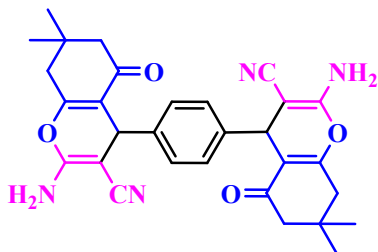

$^1\text{H}$  NMR (250 MHz,  $\text{DMSO-}d_6$ )  $\delta$  7.90 (s, 3H), 7.82 (d,  $J = 8.6$  Hz, 1H), 7.74 (d,  $J = 9.0$  Hz, 1H), 7.60 (d,  $J = 9.6$  Hz, 1H), 7.45 (d,  $J = 8.6$  Hz, 1H), 7.37 – 6.87 (m, 1H), 4.87 (s, 2H), 2.67 (s, 4H), 2.32 – 2.01 (m, 4H), 1.05 (s, 6H), 0.97 (s, 6H).

**methyl 2-amino-4-(4-chlorophenyl)-7,7-dimethyl-5-oxo-5,6,7,8-tetrahydro-4H-chromene-3-**  
**carboxylate**

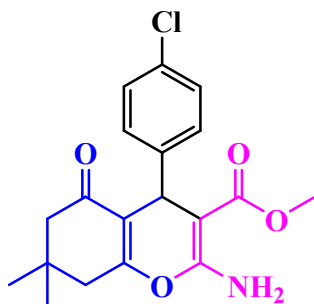

Melting point=190-192 °C,

FT-IR (KBr,  $\nu$   $\text{cm}^{-1}$ ): 3429, 2961, 2879, 1729, 1594, 1491, 1373, 1276, 1206, 1091, 837, 494;  $^1\text{H}$  NMR (250 MHz,  $\text{DMSO-}d_6$ )  $\delta$  7.58 (s, 2H), 7.24 (d,  $J = 8.4$  Hz, 2H), 7.12 (d,  $J = 8.7$  Hz, 2H), 4.46 (s, 1H), 3.47 (s, 3H), 2.20 (s, 2H), 2.07-1.97 (m, 2H), 1.04 (s, 6H).;  $^{13}\text{C}$  NMR (63 MHz,  $\text{DMSO-}d_6$ )  $\delta$  196.43, 168.64, 162.88, 159.66, 154.25, 145.74, 132.87, 130.79, 129.93, 129.81, 128.23, 115.59, 77.63, 50.99, 50.34, 33.27, 32.29, 29.01, 26.86.

**2-amino-4-(4-hydroxyphenyl)-7,7-dimethyl-5-oxo-5,6,7,8-tetrahydro-4H-chromene-3-carboxylate**

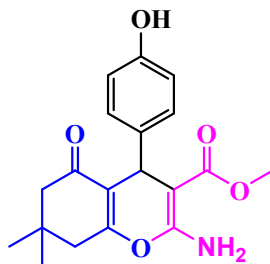

$^1\text{H}$  NMR (250 MHz,  $\text{DMSO-}d_6$ )  $\delta$  9.16 (s, 1H), 6.90 (s, 3H), 6.66 (s, 1H), 6.52 (d,  $J = 13.8$  Hz, 2H), 4.67 (s, 1H), 3.35 (s, 3H), 2.29 (s, 2H), 2.09 (s, 2H), 0.84 (s, 7H).  $^{13}\text{C}$  NMR (63 MHz,  $\text{DMSO-}d_6$ )  $\delta$  194.84, 155.43, 149.32, 138.36, 134.46, 128.87, 114.77, 112.34, 78.24, 50.75, 50.48, 32.55, 32.11, 29.55, 26.89, 14.48.

**2-amino-4-(2,4-dichlorophenyl)-7,7-dimethyl-5-oxo-5,6,7,8-tetrahydro-4H-chromene-3-carboxylate**

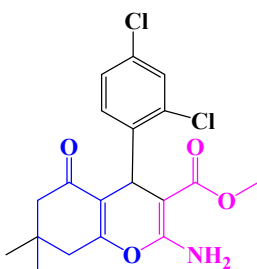

$^1\text{H}$  NMR (250 MHz,  $\text{DMSO-}d_6$ )  $\delta$  8.01 (d,  $J = 8.6$  Hz, 1H), 7.70 (d,  $J = 9.1$  Hz, 2H), 7.62 – 7.42 (m, 2H), 7.30 – 6.91 (m, 1H), 4.28 (s, 1H), 3.87 (s, 3H), 2.29 (s, 2H), 2.12 – 1.97 (m, 2H), 1.00 (d,  $J = 6.9$  Hz, 6H).  $^{13}\text{C}$  NMR (63 MHz,  $\text{DMSO-}d_6$ )  $\delta$  196.07, 168.71, 159.64, 150.01, 142.64, 133.21, 131.33, 130.37, 128.96, 128.71, 127.18, 114.10, 76.34, 50.77, 50.39, 32.61, 32.20, 29.08, 26.85, 26.68.

**2-amino-4-(4-chlorophenyl)-7-hydroxy-4H-chromene-3-carbonitrile**

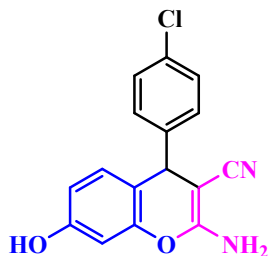

$^1\text{H}$  NMR (250 MHz,  $\text{DMSO-}d_6$ )  $\delta$  9.70 (s, 1H), 7.34 (d,  $J = 7.9$  Hz, 2H), 7.16 (d,  $J = 7.6$  Hz, 2H), 6.89 (s, 2H), 6.83 – 6.67 (m, 1H), 6.47 (d,  $J = 8.0$  Hz, 1H), 6.38 (s, 1H), 4.64 (s, 1H).

**2-amino-7-hydroxy-4-(3-nitrophenyl)-4H-chromene-3-carbonitrile**

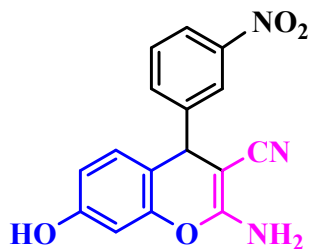

Melting point=190-192 °C,

FT-IR (KBr,  $\nu$   $\text{cm}^{-1}$ ): 3440, 3335, 3217, 3078, 2194, 1645, 1586, 1530, 1407, 1351, 1157, 851, 685;  $^1\text{H}$  NMR (250 MHz,  $\text{DMSO}-d_6$ )  $\delta$  9.78 (s, 1H), 8.27 – 7.88 (m, 2H), 7.63 (s, 2H), 7.03 (s, 2H), 6.83 (d,  $J = 8.4$  Hz, 1H), 6.62 – 6.34 (m, 2H), 4.89 (s, 1H);  $^{13}\text{C}$  NMR (63 MHz,  $\text{DMSO}-d_6$ )  $\delta$  179.41, 145.95, 137.55, 135.60, 131.51, 130.77, 130.02, 129.12, 128.89, 128.66, 128.23, 127.52, 126.97, 125.63.

**2-amino-4-(2,4-dichlorophenyl)-7-hydroxy-4H-chromene-3-carbonitrile**

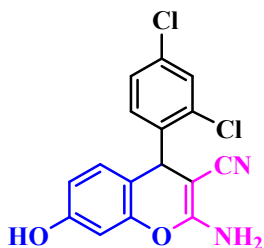

$^1\text{H}$  NMR (250 MHz,  $\text{DMSO}-d_6$ )  $\delta$  9.73 (s, 1H), 7.65 (s, 2H), 7.53 (s, 1H), 7.27 (d,  $J = 44.0$  Hz, 1H), 6.94 (s, 2H), 6.67 (s, 1H), 6.41 (d,  $J = 19.9$  Hz, 1H), 5.09 (s, 1H).

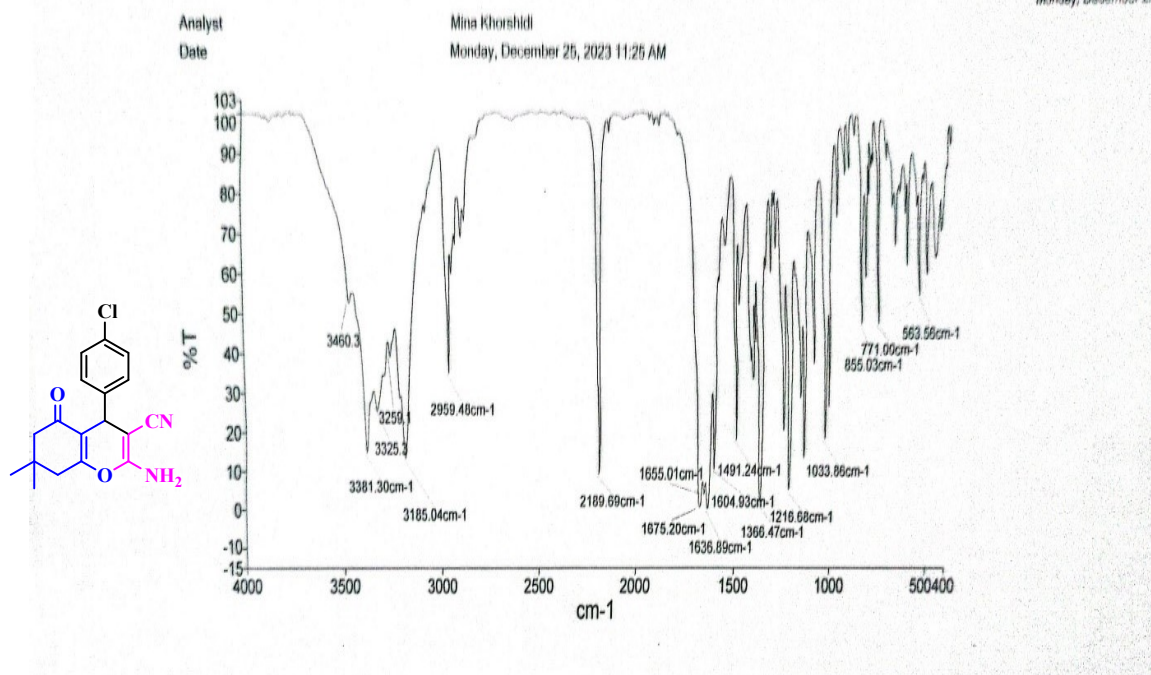

**Figure 1.** Spectrum FTIR of 2-amino-4-(4-chlorophenyl)-7,7-dimethyl-5-oxo-5,6,7,8-tetrahydro-4H-chromene-3-carbonitrile



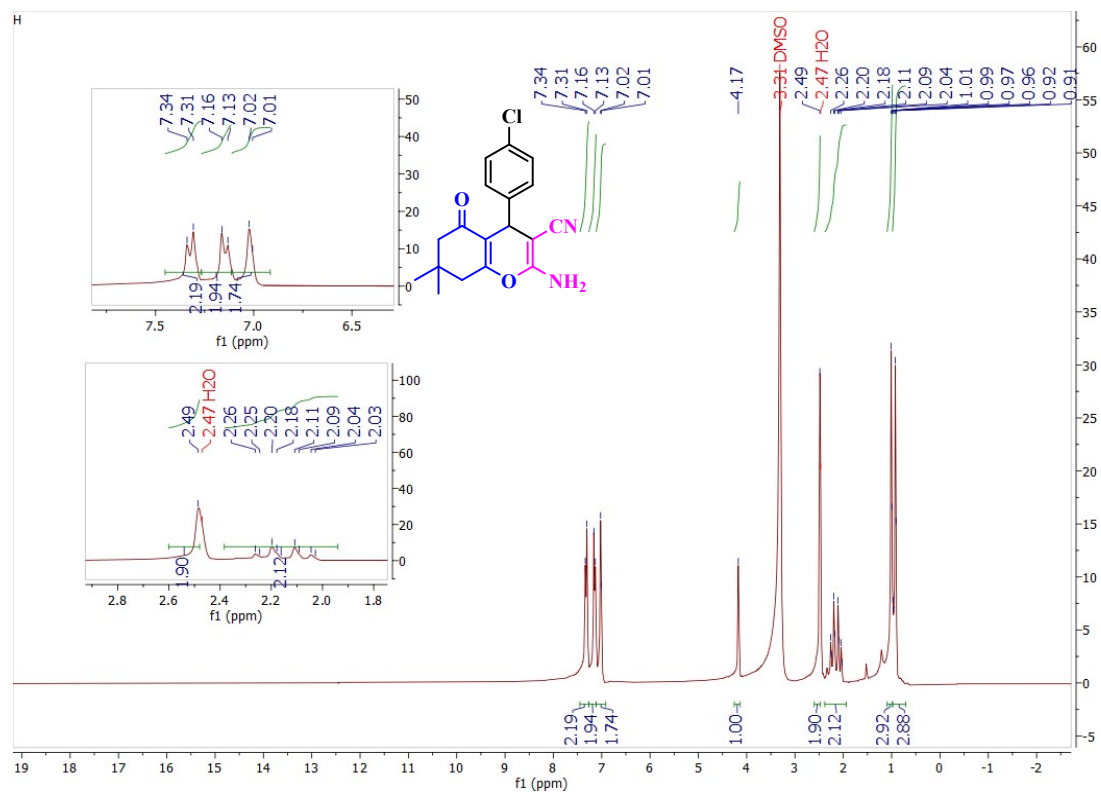

**Figure 2.** Spectrum <sup>1</sup>H NMR (250 MHz) of 2-amino-4-(4-chlorophenyl)-7,7-dimethyl-5-oxo-5,6,7,8-tetrahydro-4H-chromene-3-carbonitrile in DMSO solvent

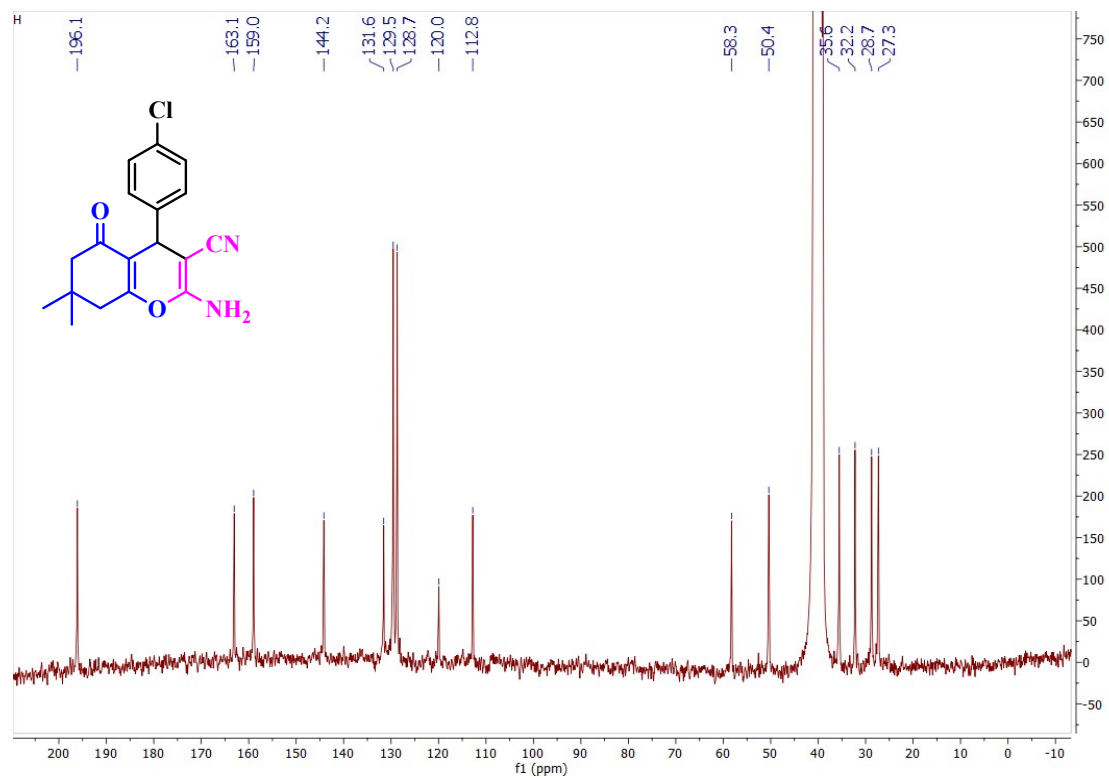

**Figure 3.** Spectrum  $^{13}\text{C}$ NMR (63 MHz) of 2-amino-4-(4-chlorophenyl)-7,7-dimethyl-5-oxo-5,6,7,8-tetrahydro-4H-chromene-3-carbonitrile in DMSO solvent

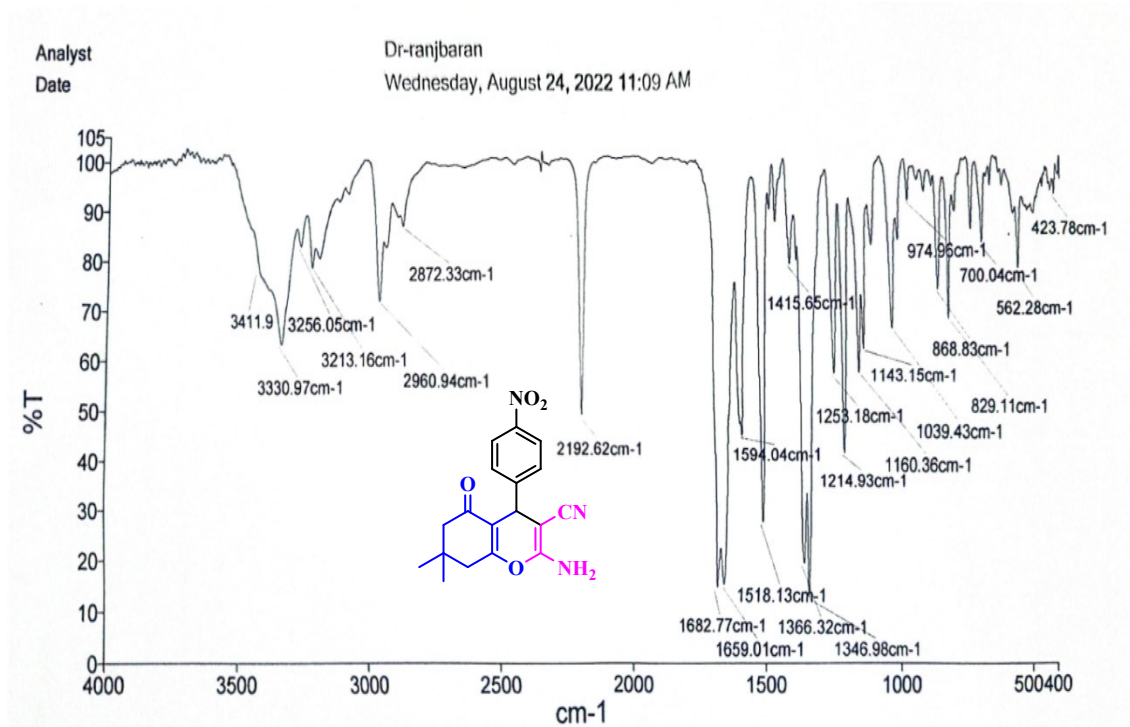

**Figure 4.** Spectrum FTIR of 2-amino-7,7-dimethyl-4-(4-nitrophenyl)-5-oxo-5,6,7,8-tetrahydro-4H-chromene-3-carbonitrile

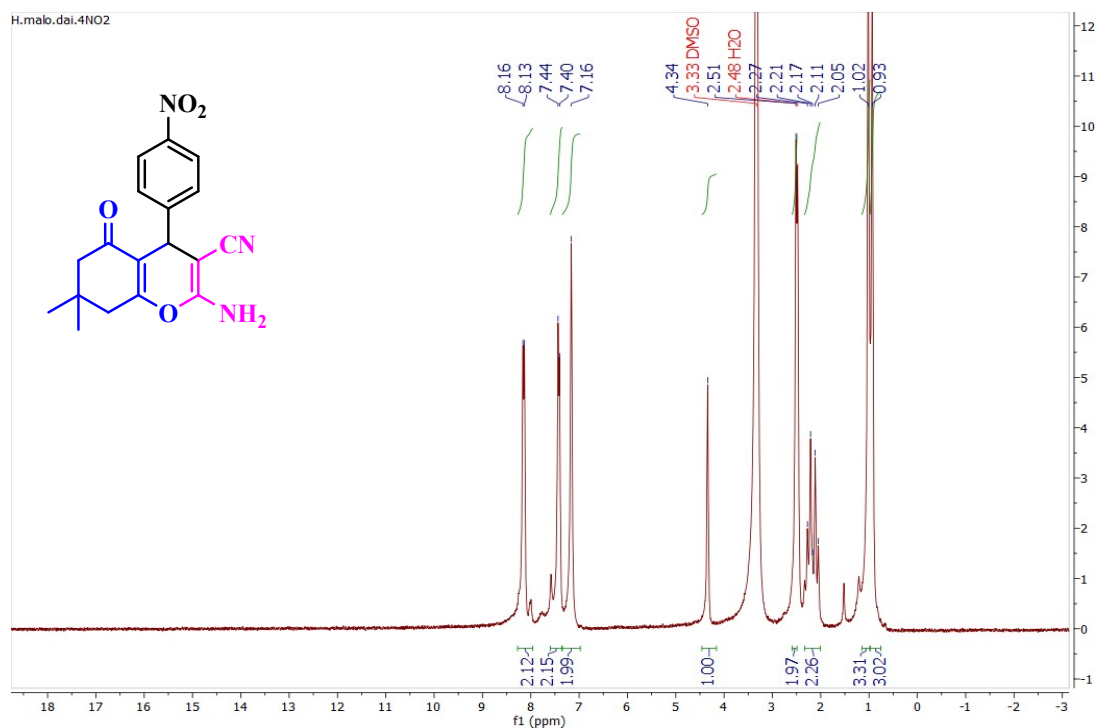

**Figure 5.** Spectrum <sup>1</sup>H NMR (250 MHz) of 2-amino-7,7-dimethyl-4-(4-nitrophenyl)-5-oxo-5,6,7,8-tetrahydro-4H-chromene-3-carbonitrile in DMSO solvent

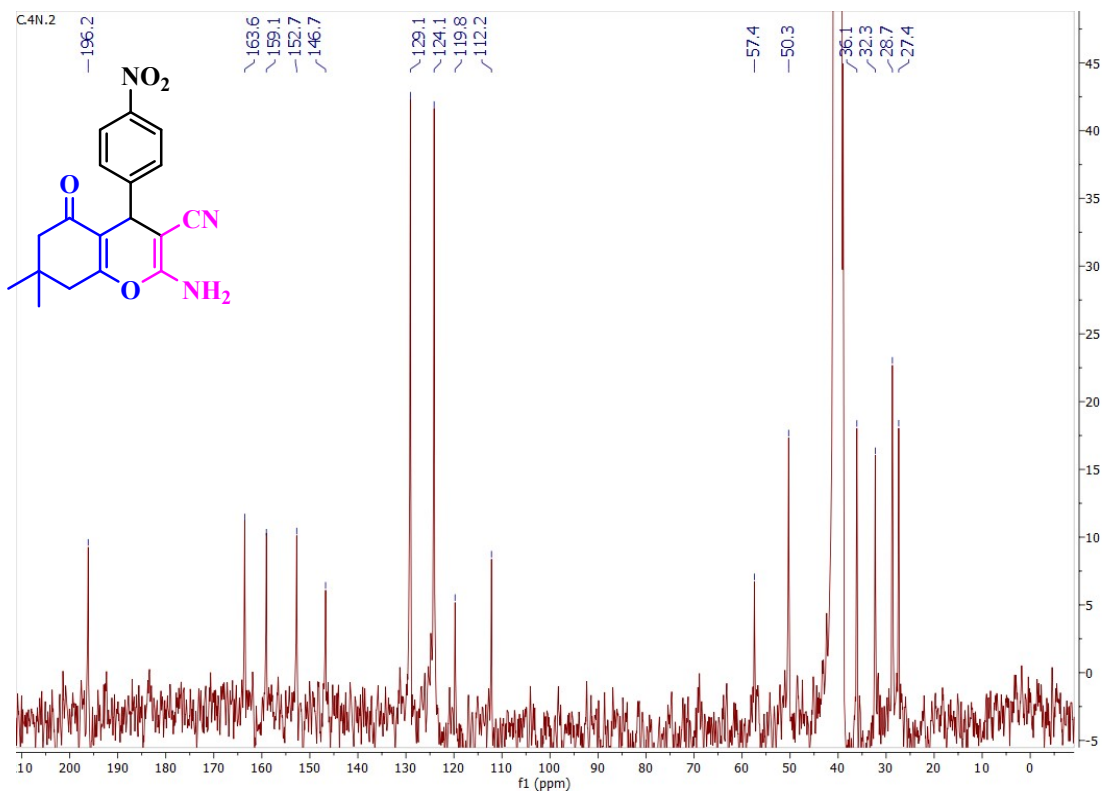

**Figure 6.** Spectrum <sup>13</sup>C NMR (63 MHz) of 2-amino-7,7-dimethyl-4-(4-nitrophenyl)-5-oxo-5,6,7,8-tetrahydro-4H-chromene-3-carbonitrile in DMSO solvent

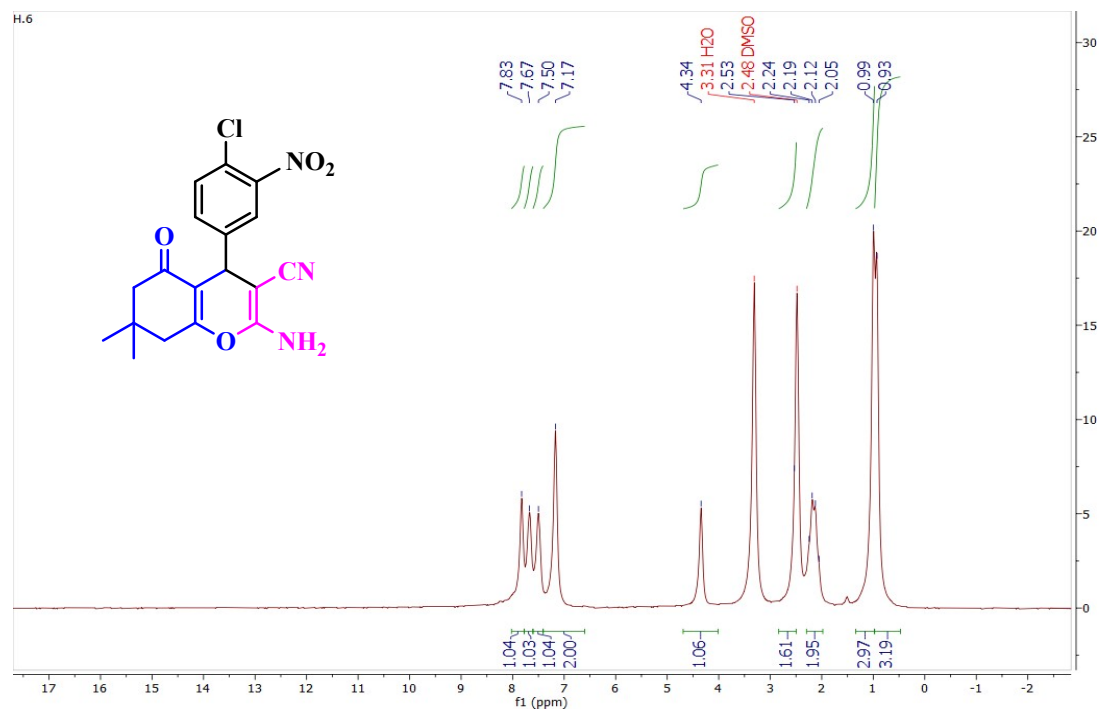

**Figure 7.** Spectrum <sup>1</sup>H NMR (250 MHz) of 2-amino-4-(4-chloro-3-nitrophenyl)-7,7-dimethyl-5-oxo-5,6,7,8-tetrahydro-4H-chromene-3-carbonitrile in DMSO solvent

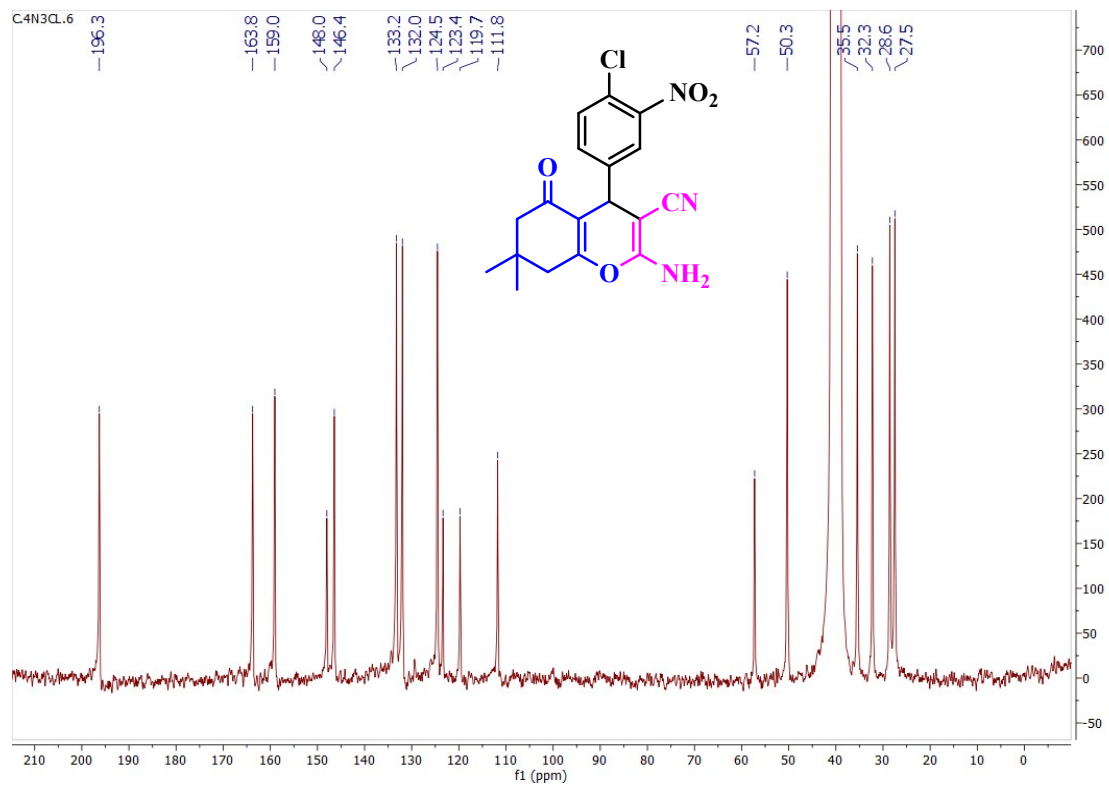

**Figure 8.** Spectrum  $^{13}\text{C}$ NMR (63 MHz) of 2-amino-4-(4-chloro-3-nitrophenyl)-7,7-dimethyl-5-oxo-5,6,7,8-tetrahydro-4H-chromene-3-carbonitrile in DMSO solvent

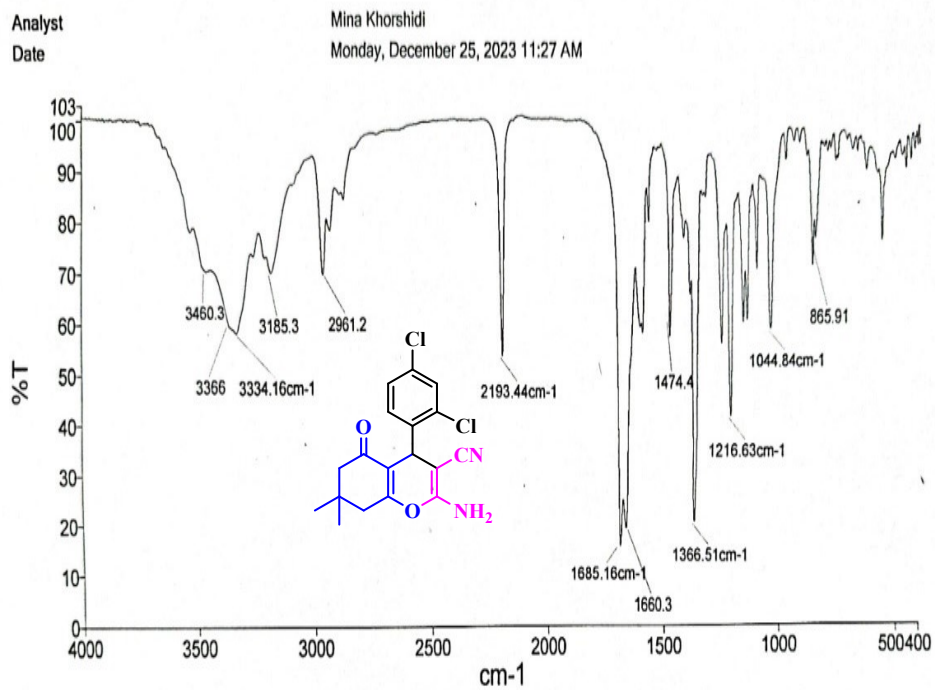

**Figure 9.** Spectrum FTIR of 2-amino-4-(2,4-dichlorophenyl)-7,7-dimethyl-5-oxo-5,6,7,8-tetrahydro-4H-chromene-3-carbonitrile

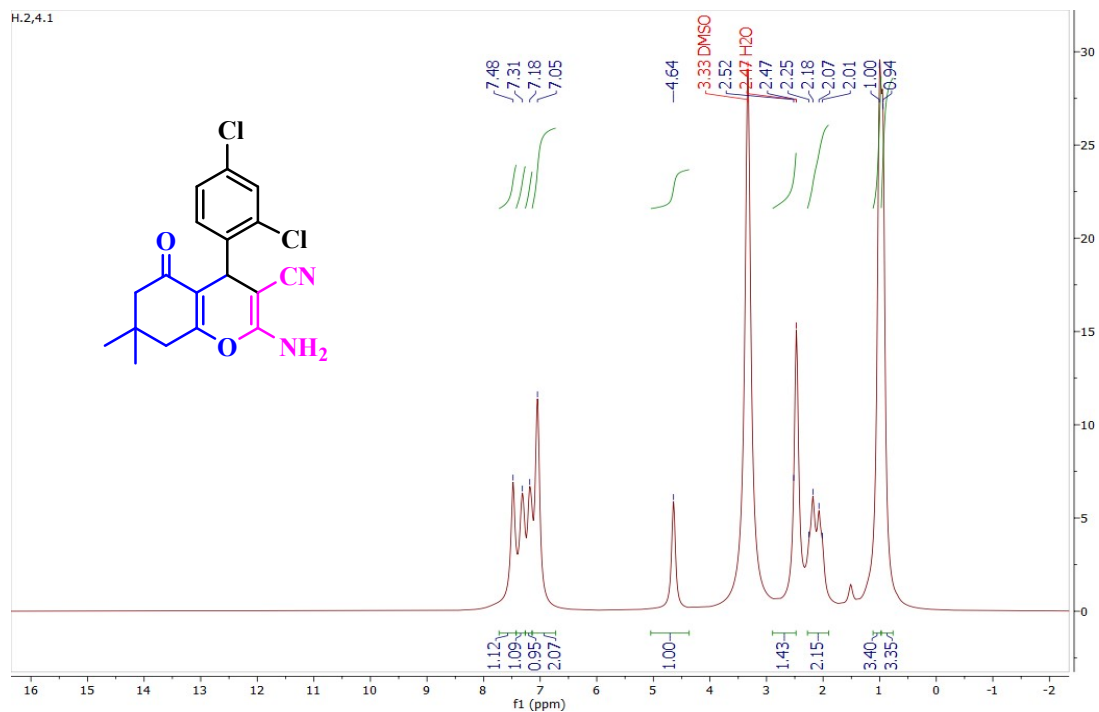

**Figure 10.** Spectrum <sup>1</sup>H NMR (250 MHz) of 2-amino-4-(2,4-dichlorophenyl)-7,7-dimethyl-5-oxo-5,6,7,8-tetrahydro-4H-chromene-3-carbonitrile in DMSO solvent

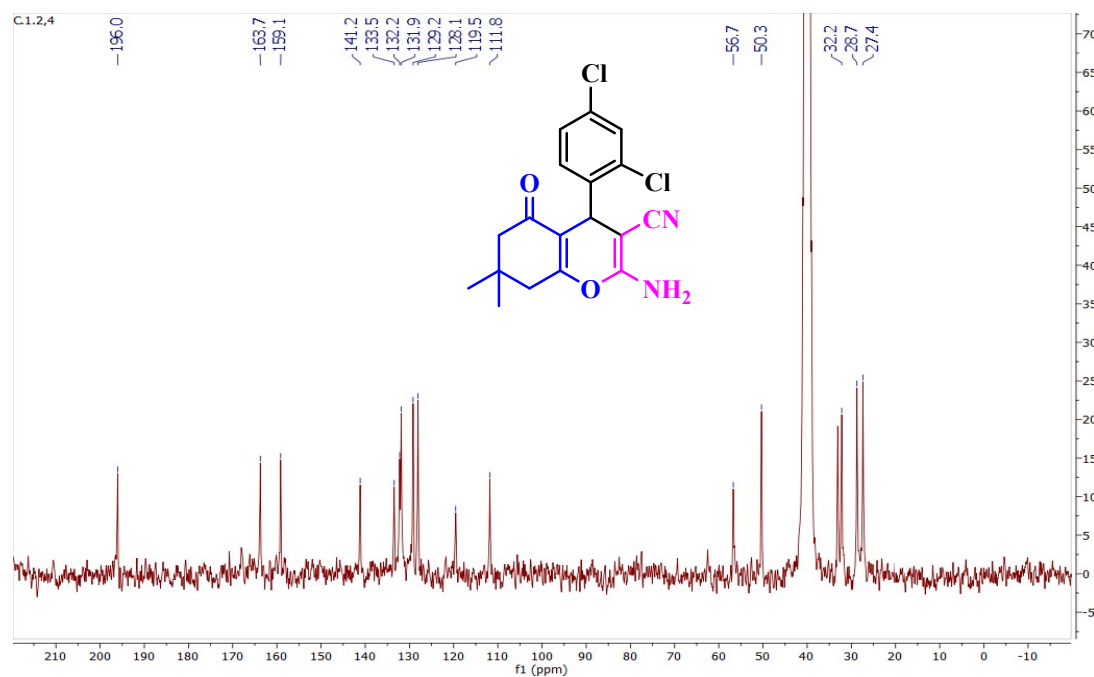

**Figure 11.** Spectrum <sup>13</sup>CNMR (63 MHz) of 2-amino-4-(2,4-dichlorophenyl)-7,7-dimethyl-5-oxo-5,6,7,8-tetrahydro-4H-chromene-3-carbonitrile in DMSO solvent

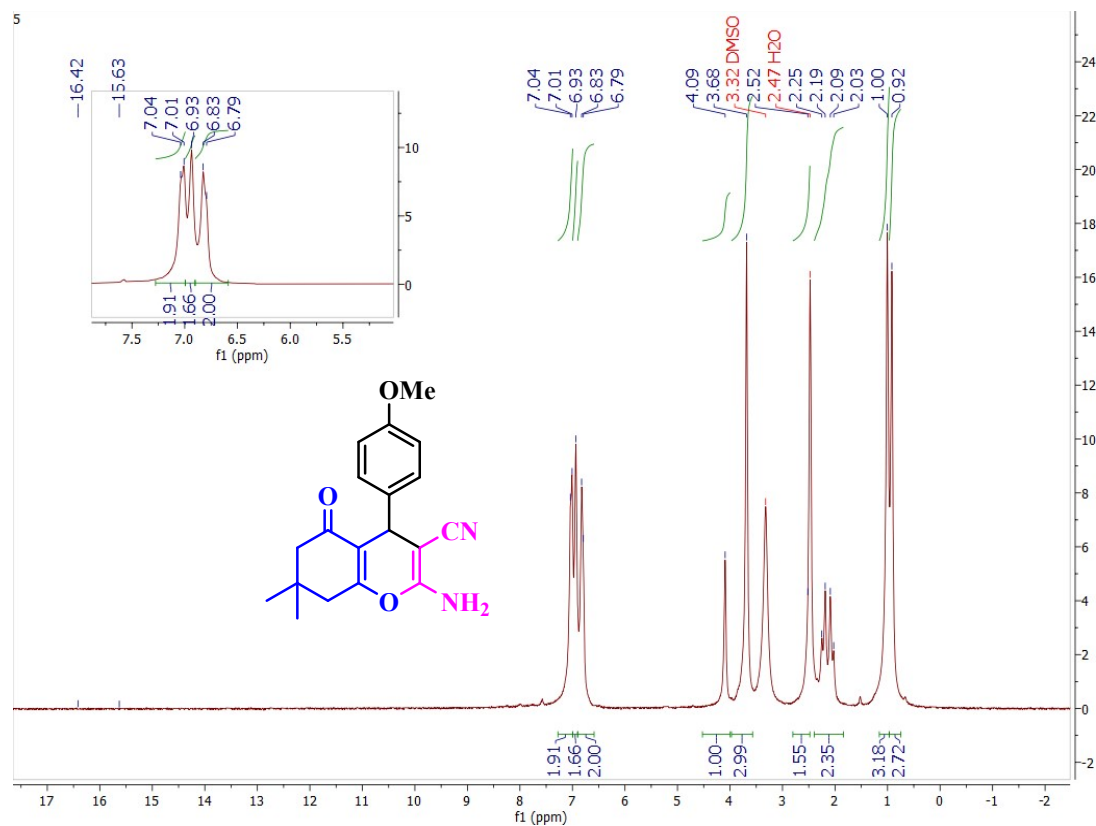

**Figure 12.** Spectrum  $^1\text{H}$  NMR (250 MHz) of 2-amino-4-(4-methoxyphenyl)-7,7-dimethyl-5-oxo-5,6,7,8-tetrahydro-4H-chromene-3-carbonitrile in DMSO solvent

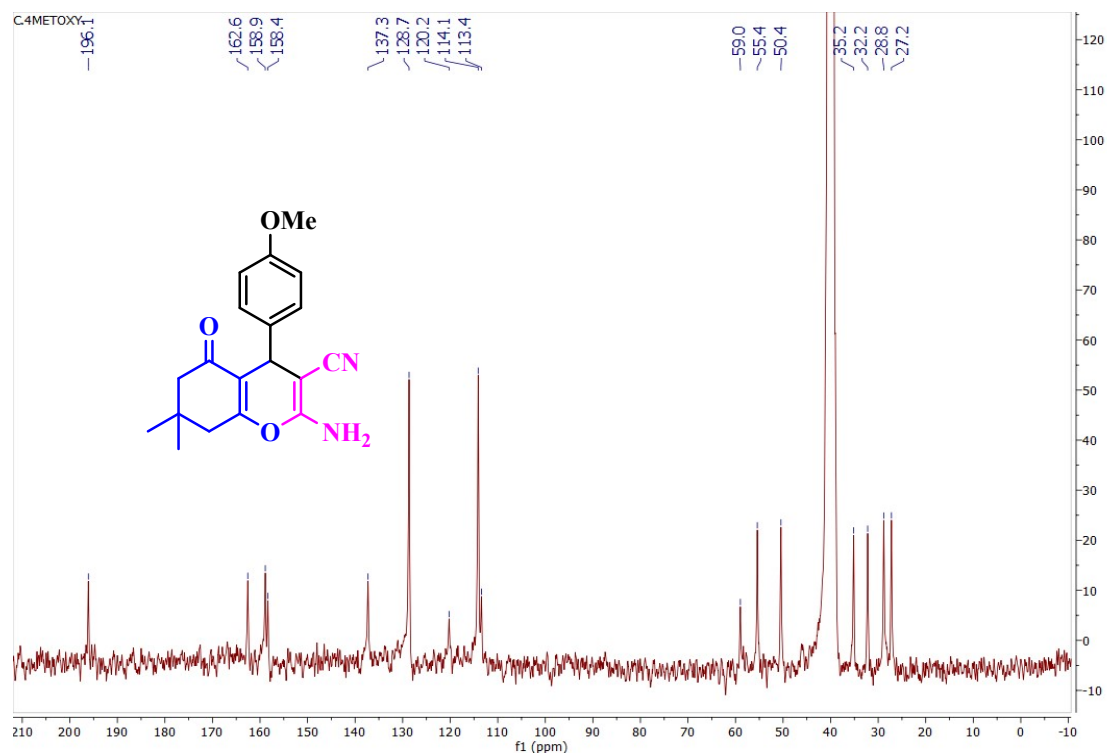

**Figure 13.** Spectrum  $^{13}\text{C}$  NMR (63 MHz) of 2-amino-4-(4-methoxyphenyl)-7,7-dimethyl-5-oxo-5,6,7,8-tetrahydro-4H-chromene-3-carbonitrile in DMSO solvent



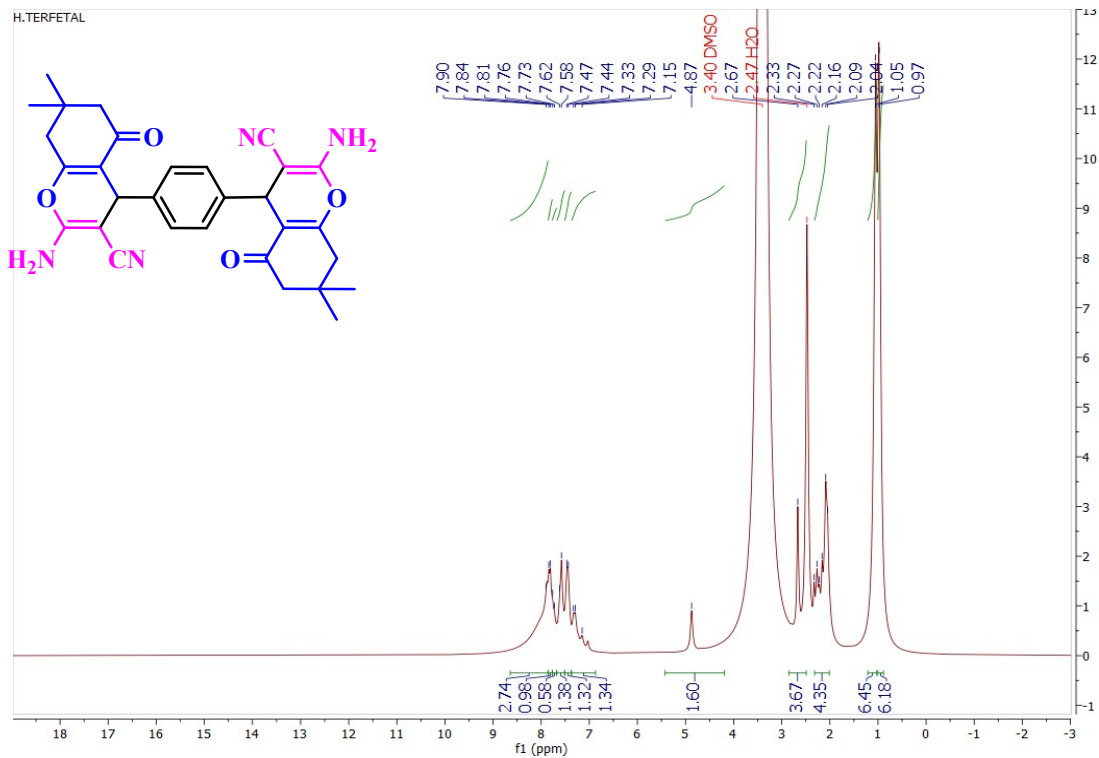

**Figure 14.** Spectrum <sup>1</sup>H NMR (250 MHz) of 4,4'-(1,4-phenylene)bis(2-amino-7,7-dimethyl-5-oxo-5,6,7,8-tetrahydro-4H-chromene-3-carbonitrile) in DMSO solvent

Analyst  
Date

Mina Khorshidi  
Wednesday, January 10, 2024 11:59 AM

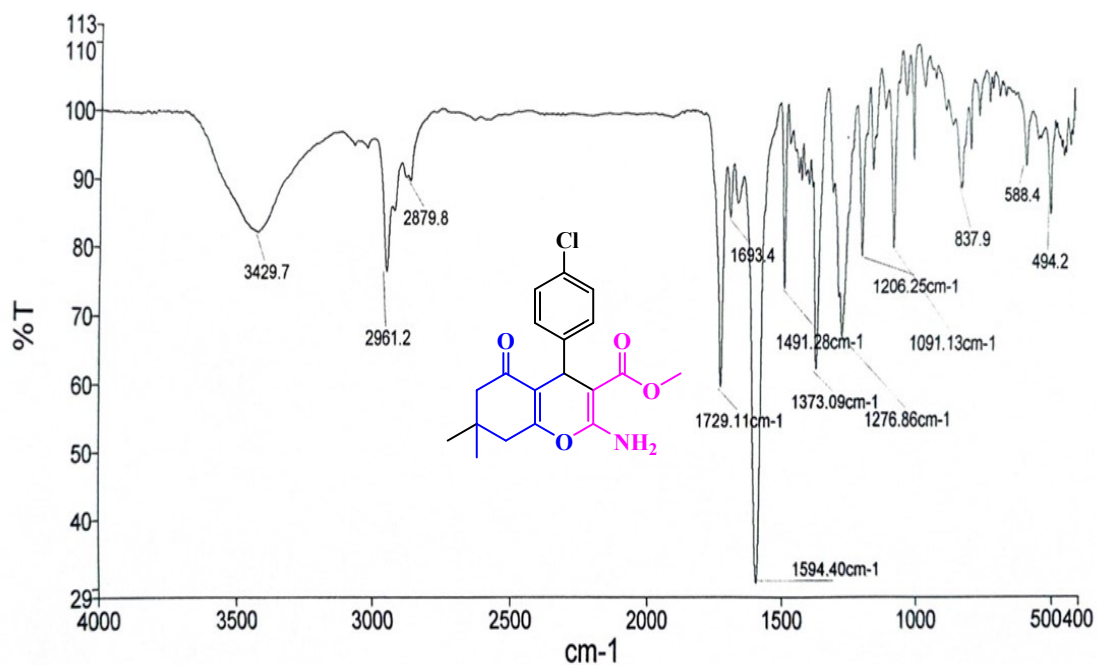

**Figure 15.** Spectrum FTIR of methyl 2-amino-4-(4-chlorophenyl)-7,7-dimethyl-5-oxo-5,6,7,8-tetrahydro-4H-chromene-3-carboxylate

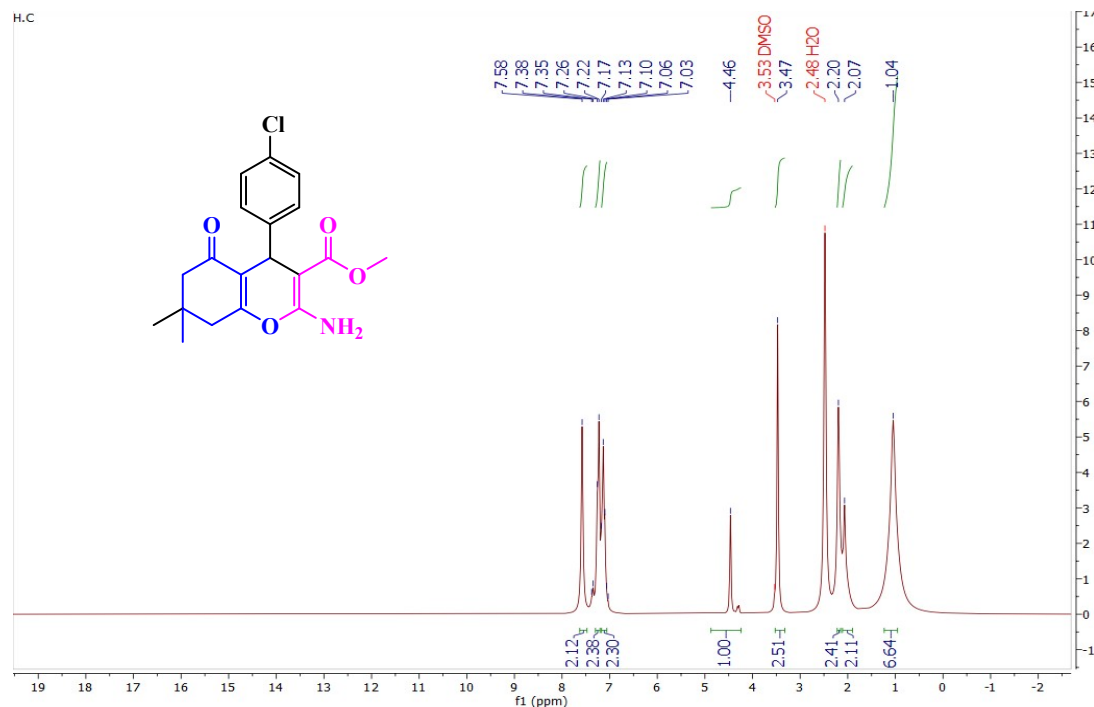

**Figure 16.** Spectrum  $^1\text{H}$  NMR (250 MHz) of methyl 2-amino-4-(4-chlorophenyl)-7,7-dimethyl-5-oxo-5,6,7,8-tetrahydro-4H-chromene-3-carboxylate in DMSO solvent

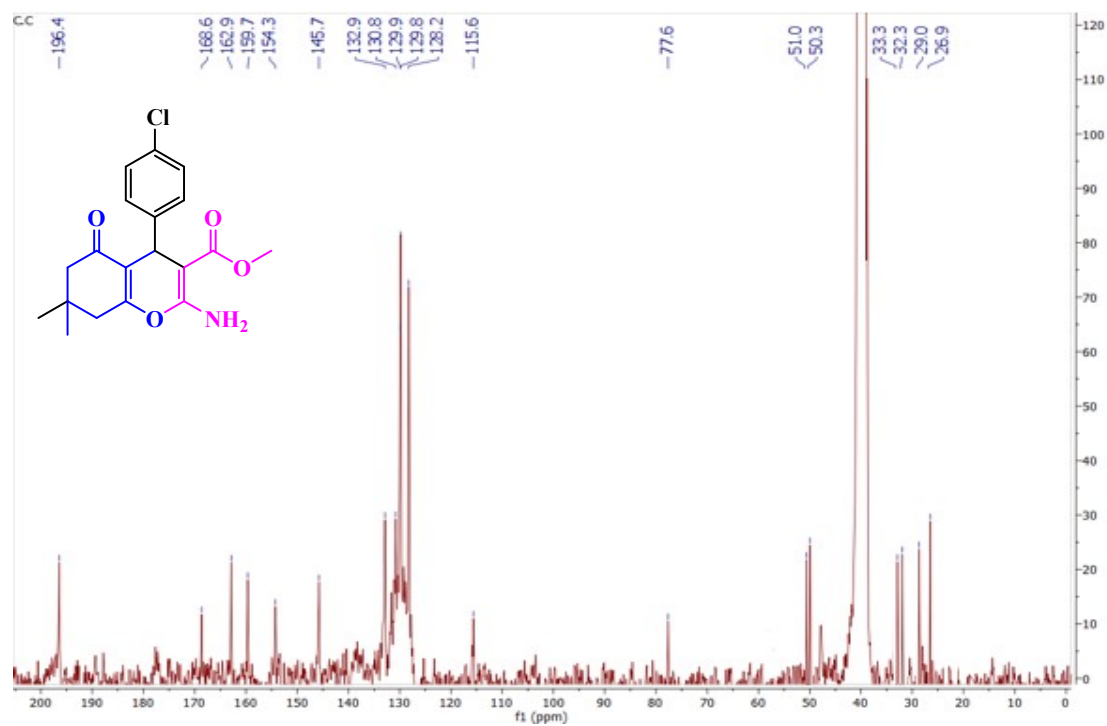

**Figure 17.** Spectrum  $^{13}\text{C}$  NMR (63 MHz) of methyl 2-amino-4-(4-chlorophenyl)-7,7-dimethyl-5-oxo-5,6,7,8-tetrahydro-4H-chromene-3-carboxylate in DMSO solvent

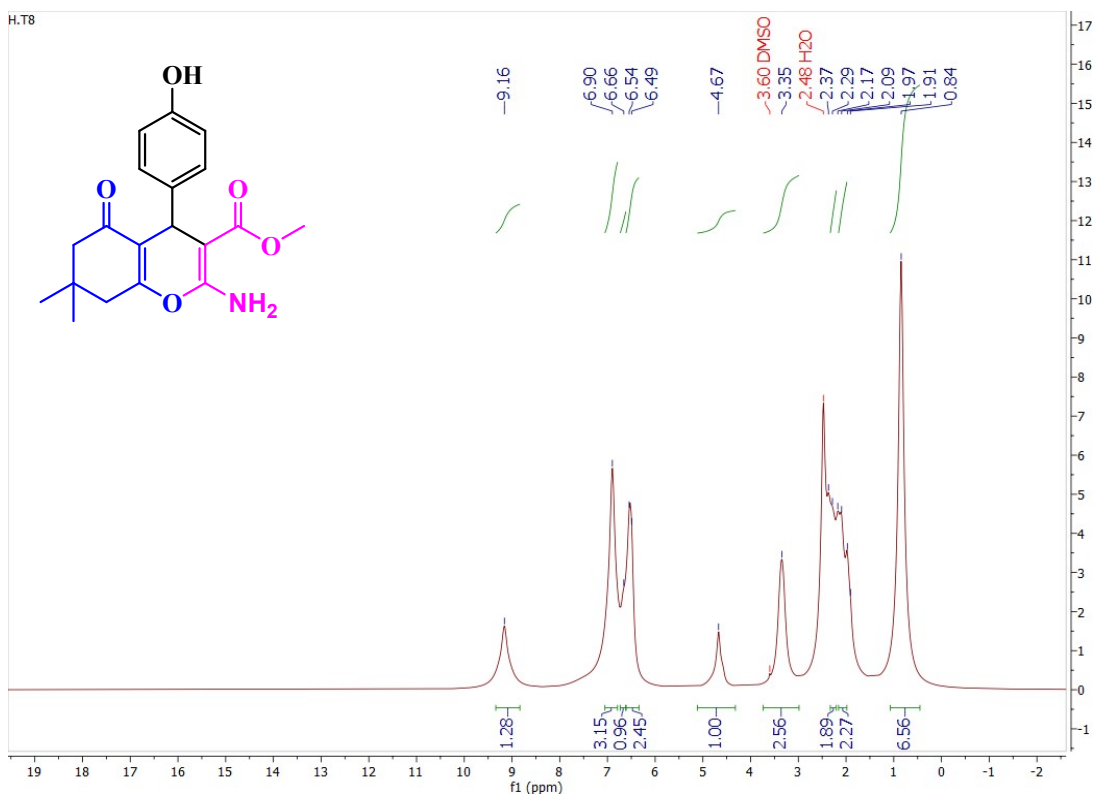

**Figure 18.** Spectrum  $^1\text{H}$  NMR (250 MHz) of methyl 2-amino-4-(4-hydroxyphenyl)-7,7-dimethyl-5-oxo-5,6,7,8-tetrahydro-4H-chromene-3-carboxylate in DMSO solvent

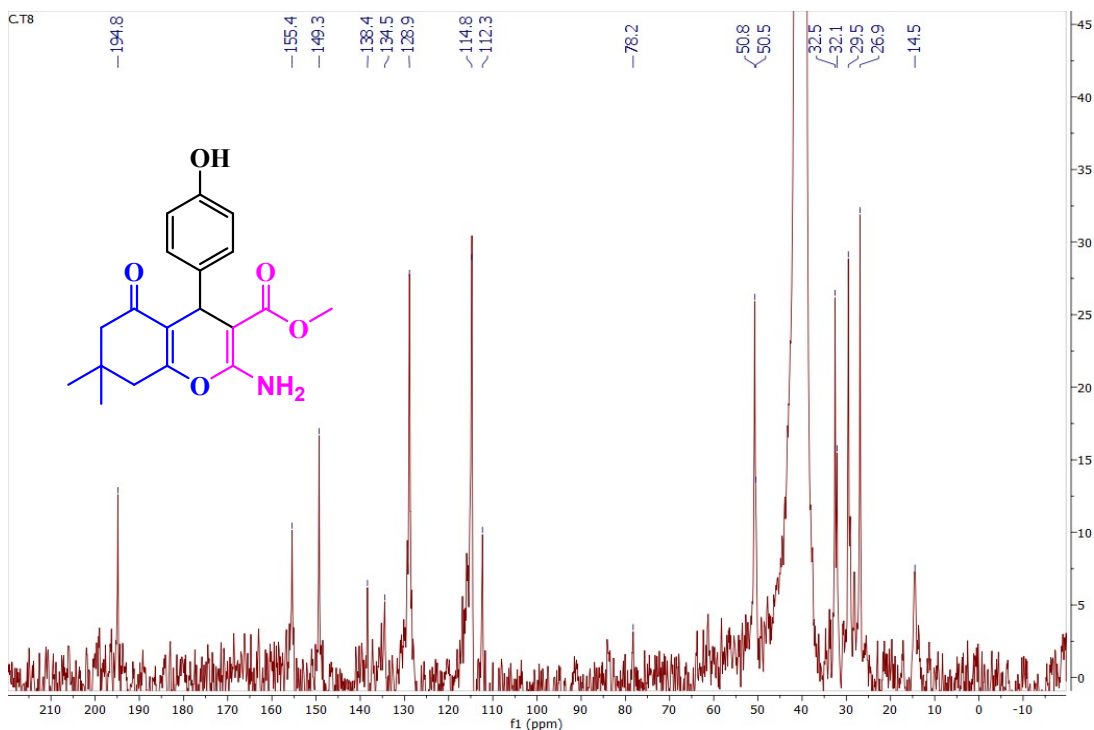

**Figure 19.** Spectrum  $^{13}\text{C}$  NMR (63 MHz) of methyl 2-amino-4-(4-hydroxyphenyl)-7,7-dimethyl-5-oxo-5,6,7,8-tetrahydro-4H-chromene-3-carboxylate in DMSO solvent

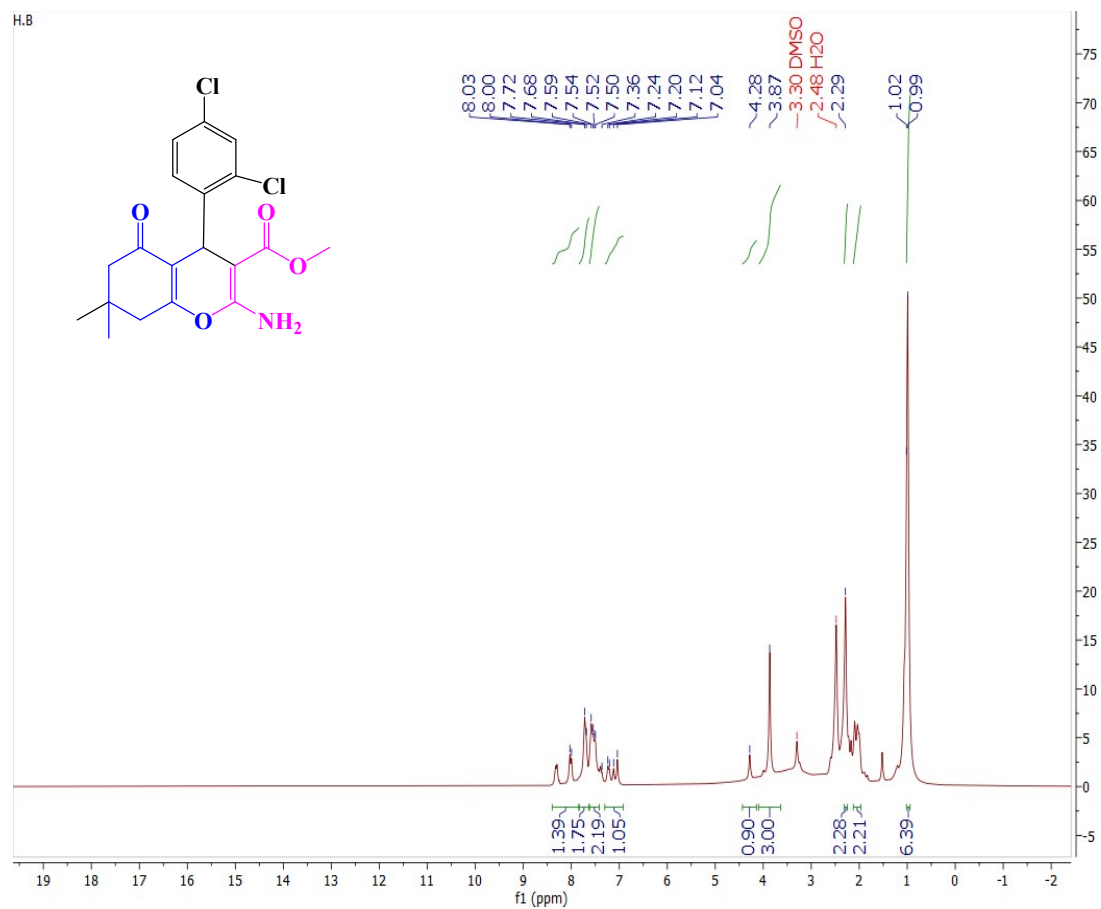

**Figure 20.** Spectrum <sup>1</sup>H NMR (250 MHz) of methyl 2-amino-4-(2,4-dichlorophenyl)-7,7-dimethyl-5-oxo-5,6,7,8-tetrahydro-4H-chromene-3-carboxylate in DMSO solvent

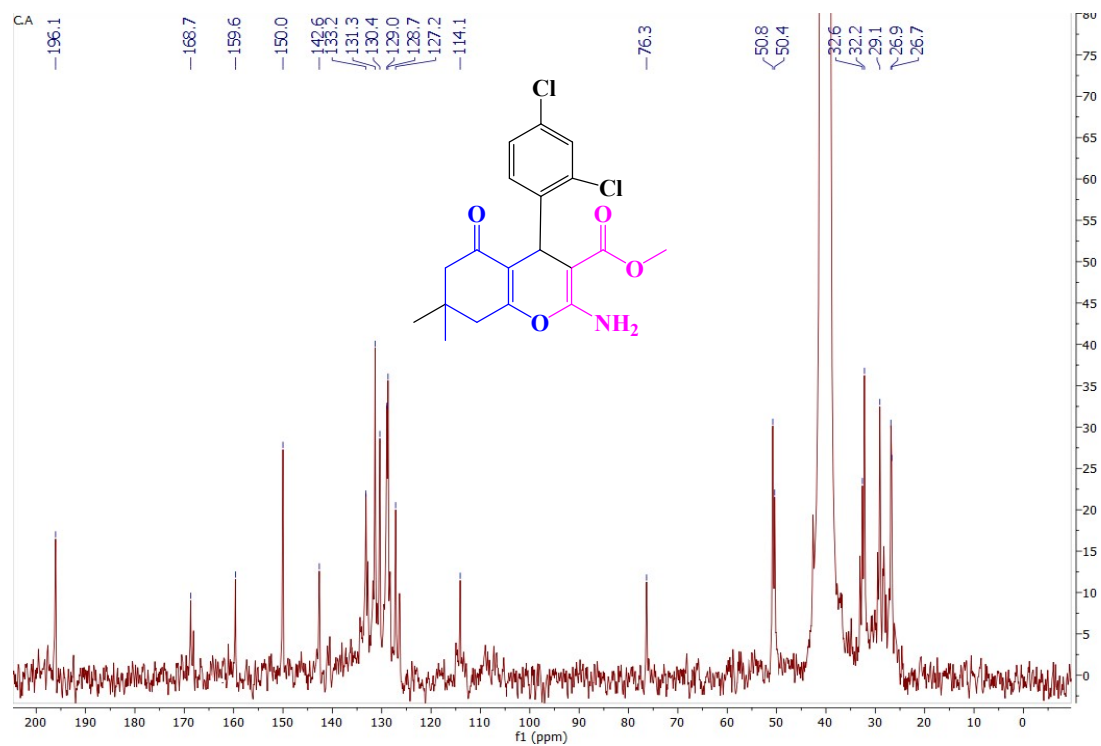

**Figure 21.** Spectrum  $^{13}\text{C}$  NMR (63 MHz) of methyl 2-amino-4-(2,4-dichlorophenyl)-7,7-dimethyl-5-oxo-5,6,7,8-tetrahydro-4H-chromene-3-carboxylate in DMSO solvent

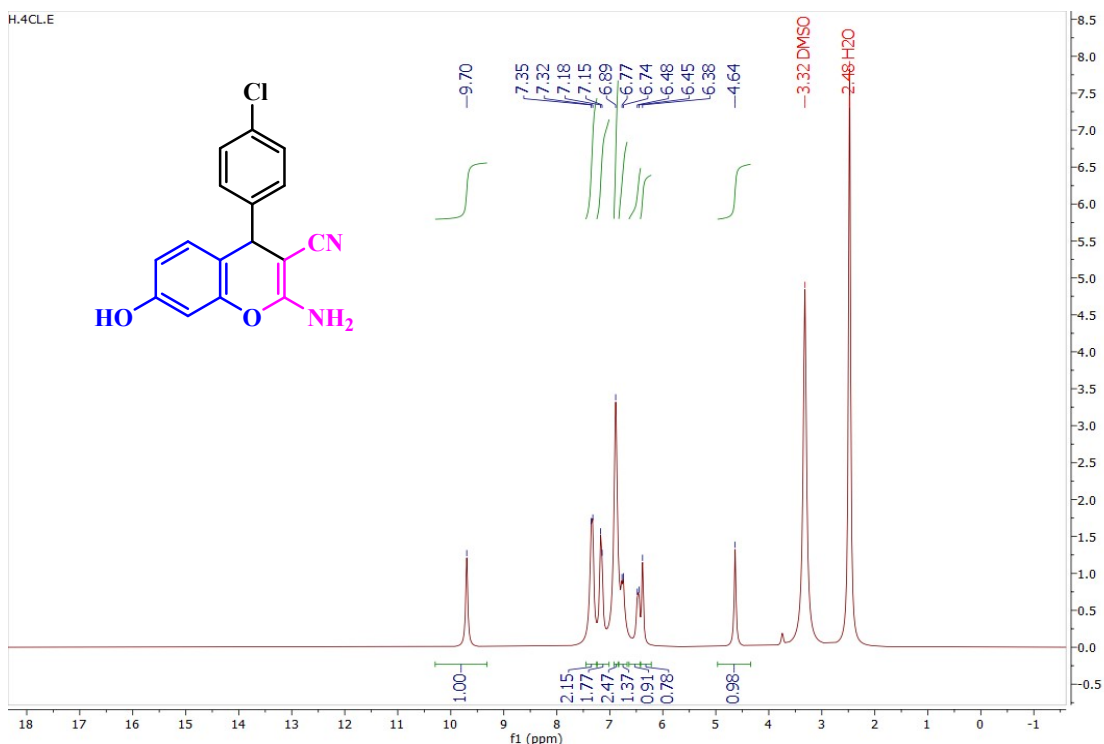

Figure 22. Spectrum  $^1\text{H}$  NMR (250 MHz) of 2-amino-4-(4-chlorophenyl)-7-hydroxy-4H-chromene-3-carbonitrile in DMSO solvent

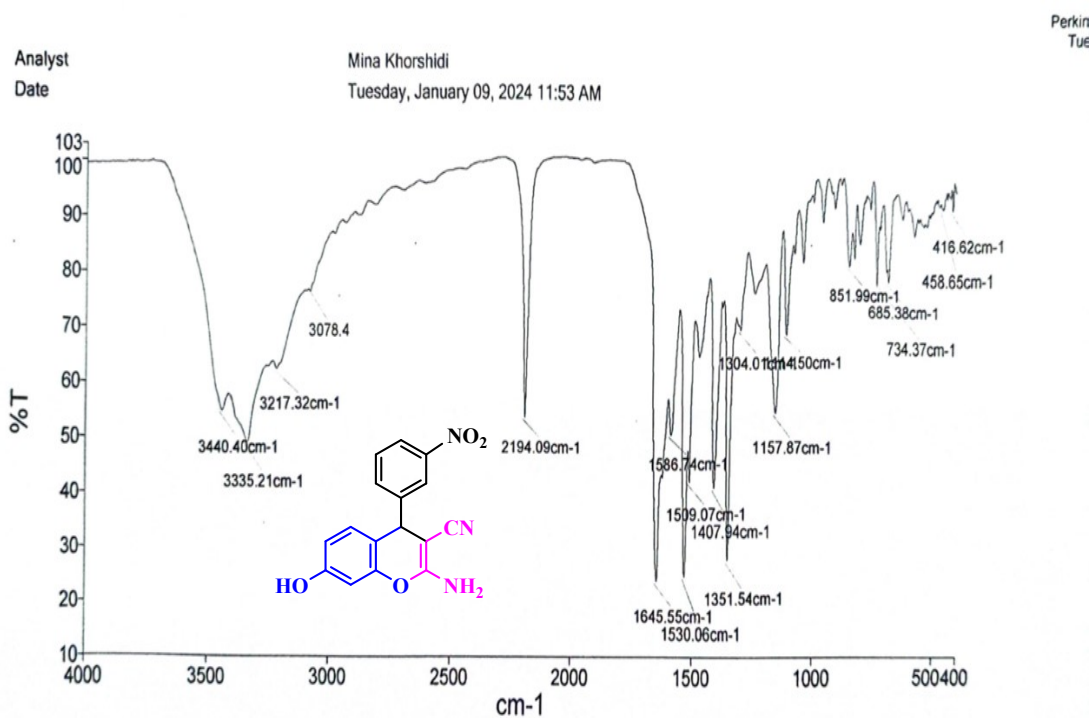

Figure 23. Spectrum FTIR of 2-amino-7-hydroxy-4-(3-nitrophenyl)-4H-chromene-3-carbonitrile

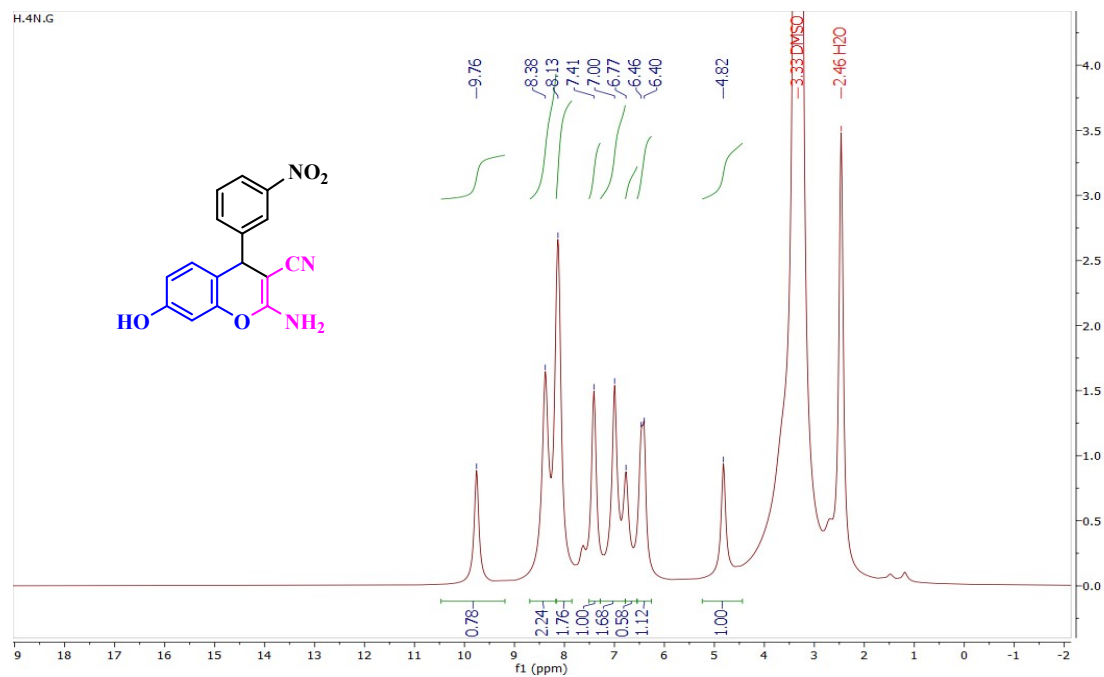

**Figure 24.** Spectrum <sup>1</sup>H NMR (250 MHz) of 2-amino-7-hydroxy-4-(3-nitrophenyl)-4H-chromene-3-carbonitrile in DMSO solvent



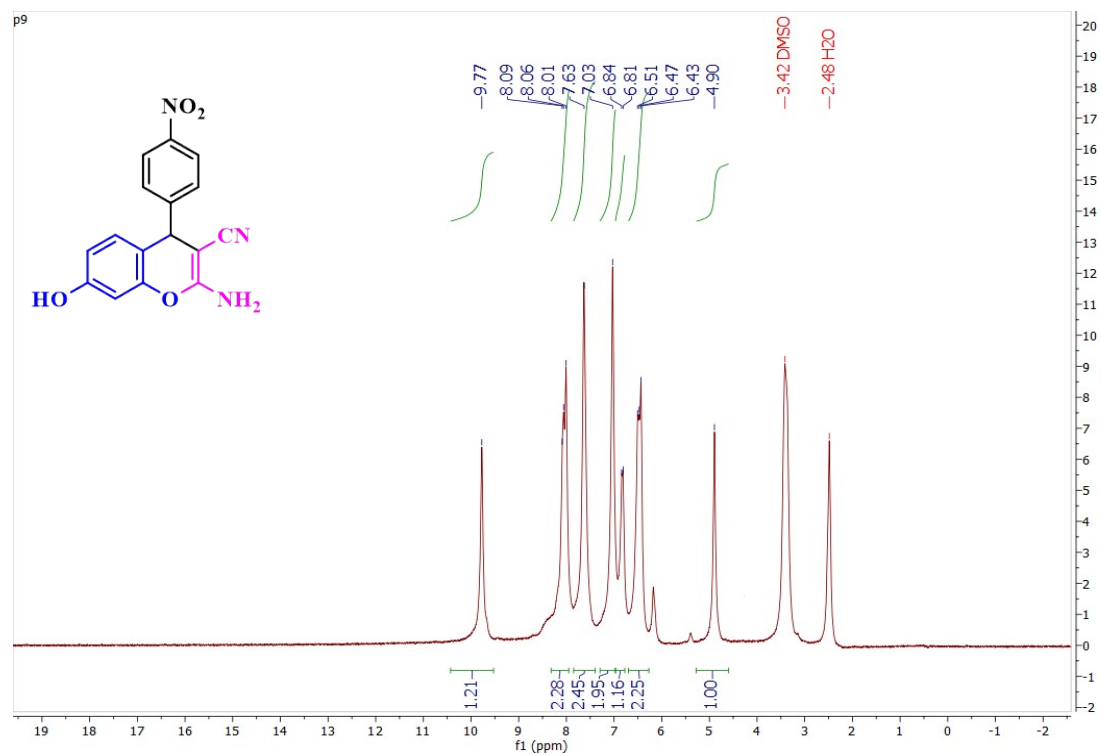

**Figure 25.** Spectrum <sup>1</sup>H NMR (250 MHz) of 2-amino-7-hydroxy-4-(4-nitrophenyl)-4H-chromene-3-carbonitrile in DMSO solvent

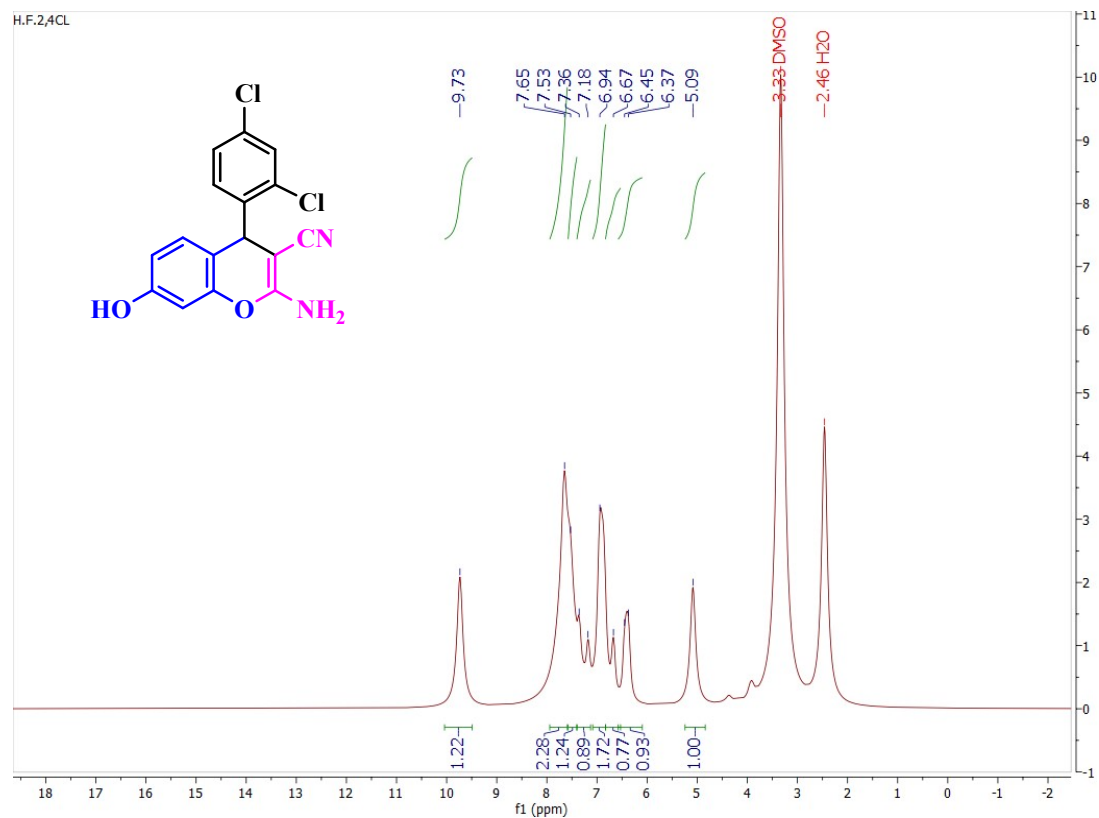

**Figure 26.** Spectrum <sup>1</sup>H NMR (250 MHz) of 2-amino-4-(2,4-dichlorophenyl)-7-hydroxy-4H-chromene-3-carbonitrile in DMSO solvent
